# Supplementary material for: Treating Patients As People: What Do Hospital Patients Want Clinicians to Know About Them As a Person?
Source: PubMed Central journal article supplement — J Patient Exp. 2019 Mar 11;7(2):270–4. doi: 10.1177/2374373519826244 (PMC7427369; doi:10.1177/2374373519826244), 2019-03-11
Supplement: More_about_Me_form_(1).pdf [file More_about_Me_form_%281%29.pdf]

**ATTACH THIS COMPLETED SHEET TO PATIENTS BED**

**THIS SIDE UP**

**THIS PERSON WOULD LIKE TO BE KNOWN BY THEIR:**

Preferred Greeting: (Check one)

First Name  Last Name  Other

**IMPORTANT INFORMATION THAT THIS PERSON WOULD LIKE YOU TO KNOW ABOUT THEM:**

1. \_\_\_\_\_

2. \_\_\_\_\_

3. \_\_\_\_\_

4. \_\_\_\_\_

5. \_\_\_\_\_

**BACK PAGE - THIS SIDE DOWN**

1. Admission Date (MM/DD/YY) \_\_\_\_\_

2. Respondent: Patient  Agent

3. Site of care: TICU  MICU  Med-Surg

4. Zip code of primary household: \_\_\_\_\_

5. Sex: Male  Female  Other

6. Age:

18 to 24 years

25 to 44 years

45 to 64 years

65 to 84 years

85 years and over

7. Race/Ethnicity:

White

Hispanic, Latino, or Spanish origin

Black or African American

Asian

Other
